# Supplementary material for: Synthesis, photophysical, and electrochemical properties of β-substituted imidazole-appended metalloporphyrins and their NLO application
Source: Royal Society of Chemistry journal article supplement (doi:10.1039/d5dt02146d), 2026-01-01
Supplement: d5dt02146d1.pdf [file d5dt02146d1.pdf]

Electronic Supporting Information (ESI) for

**Synthesis, Photophysical, and Electrochemical Properties of  $\beta$ -Substituted Imidazole-Appended Metalloporphyrins and their NLO Application**

Sumit Kumar Yadav<sup>a</sup>, Albin Kuriakose<sup>b</sup>, Shivani Rathi<sup>a</sup>, G. Vijaya Prakash<sup>b\*</sup> and Muniappan Sankar<sup>a\*</sup>

<sup>a</sup>*Department of Chemistry, Indian Institute of Technology Roorkee, Roorkee 247667, India*

<sup>b</sup>*Nanophotonics Lab, Department of Physics, Indian Institute of Technology Delhi, New Delhi 110016, India*

| Table of contents |                                                                                                                                                                                                                                                                         | Page No. |
|-------------------|-------------------------------------------------------------------------------------------------------------------------------------------------------------------------------------------------------------------------------------------------------------------------|----------|
|                   | Experimental section                                                                                                                                                                                                                                                    | S2       |
| Fig. S1           | MALDI-TOF mass spectrum of NiTPP(Phen) with HABA matrix in positive ion mode at 298 K.                                                                                                                                                                                  | S4       |
| Fig. S2           | MALDI-TOF mass spectrum of ZnTPP(Phen) with HABA matrix in positive ion mode at 298 K.                                                                                                                                                                                  | S5       |
| Fig. S3           | MALDI-TOF mass spectrum of CoTPP(Phen) with HABA matrix in positive ion mode at 298 K.                                                                                                                                                                                  | S5       |
| Fig. S4           | MALDI-TOF mass spectrum of CuTPP(Phen) with HABA matrix in positive ion mode at 298 K.                                                                                                                                                                                  | S6       |
| Fig. S5           | <sup>1</sup> H NMR spectrum of NiTPP(Phen) in DMSO-d <sub>6</sub> at 298 K.                                                                                                                                                                                             | S6       |
| Fig. S6           | <sup>1</sup> H NMR spectrum of ZnTPP(Phen) in DMSO-d <sub>6</sub> at 298 K.                                                                                                                                                                                             | S7       |
| Fig. S7           | Energy profile depicting frontier molecular orbitals for MTPP(Phen) (M = Co, Ni).                                                                                                                                                                                       | S8       |
| Fig. S8           | Ground state optimized geometries showing top views of (a) H <sub>2</sub> TPP(Phen), (c) CuTPP(Phen), (e) ZnTPP(Phen) side view (b) of H <sub>2</sub> TPP(Phen), (d) CuTPP(Phen), (f) ZnTPP(Phen) ( <i>meso</i> -phenyl has been removed for clarity in the side view). | S9       |
| Fig. S9           | Ground state optimized geometries showing top views of (a) CoTPP(Phen), (c) NiTPP(Phen), side view (b) of CoTPP(Phen), (d)                                                                                                                                              | S9       |

|          |                                                                                                                                                                    |         |
|----------|--------------------------------------------------------------------------------------------------------------------------------------------------------------------|---------|
|          | NiTPP(Phen) ( <i>meso</i> -phenyl has been removed for clarity in the side view).                                                                                  |         |
| Fig. S10 | Displacement of 24-core atoms of porphyrin from mean plane of (a) H <sub>2</sub> TPP(Phen), (b) CuTPP(Phen), (c) ZnTPP(Phen), (d) CoPP(Phen), and (e) NiTPP(Phen). | S10     |
| Table S1 | Selected bond lengths (Å) and bond angles (°) of H <sub>2</sub> TPP(Phen), CoTPP(Phen), ZnTPP(Phen), and CuPP(Phen).                                               | S11-S12 |

## Experimental section

### Instrumentation and Methods

<sup>1</sup>H NMR spectra were recorded on JEOL ECX 500 MHz using DMSO-d<sub>6</sub> as solvent at 298 K. The photophysical data was recorded on Shimadzu UV-1800 spectrophotometer. MALDI-TOF MS were recorded on Bruker UltrafleXtreme-TN MALDI-TOF spectrometer using HABA as a matrix at 298 K. EPR spectrum was recorded using Bruker BIOSPIN EMXmicro A200 in distilled toluene at 100 K. Spectrum was simulated in the powder phase using WINEPR SimFonia software. Cyclic voltametric studies were carried out in CHI 7044E work station having three electrode assembly consisting of a platinum electrode as a working electrode, a platinum counter electrode, and saturated Ag/AgCl as a reference electrode at 298 K under argon atmosphere in dry CH<sub>2</sub>Cl<sub>2</sub>.

Z-scan measurements with open aperture (OA) and closed aperture (CA) configurations were conducted utilizing a Ti:Sapphire laser operating at 800 nm, featuring an 84 MHz repetition rate and a pulse duration of 120 fs. The elaborate Z-scan setup is explained elsewhere. A 15 cm convex lens was used where the corresponding Rayleigh length was 2.54 mm and a sample cuvette (quartz) of 1 mm path length. The transmittance signal for each Z movement was acquired using a photodiode linked to the NI-Scope, with the position adjusted by a computer-controlled translation stage.

### Experimental Section

### **General procedure for the synthesis of MTPP(Phen) [M = 2H, Zn(II), Ni(II), Co(II), or Cu(II)] complexes**

To a solution of 2-formyl-5,10,15,20-tetraphenylmatallo-porphyrins (MTPPCHO) (0.057 mmol) in distilled chloroform (30 ml), glacial acetic acid (6 ml), (chloroform/acetic acid (5:1)), 1,10-phenonthroline-dione and ammonium acetate (1.14 mmol) were added to the reaction mixture and allowed to reflux at 65°C for 72 hours. After completion (monitored by TLC), the mixture was cooled to room temperature and washed with water (3 × 30 mL) to remove excess acetic acid and ammonium salts. The organic phase was separated, dried over anhydrous Na<sub>2</sub>SO<sub>4</sub>, and concentrated under reduced pressure to yield a crude solid. Purification was carried out using silica gel column chromatography. A chloroform/methanol mixture (98:2, v/v) was identified as the optimal eluent during purification trials. Elution with this solvent system afforded the  $\beta$ -imidazole-appended metalloporphyrins as colored solids in **72–88% yield**.

#### **NiTPP(Phen)**

Red solid, yield: 45 mg (88%); UV  $\lambda_{\text{max}}$  ( $\epsilon \times 10^{-5} \text{ L mol}^{-1} \text{ cm}^{-1}$ ): 423 (5.33), 537 (4.26), 571 (3.96) nm; <sup>1</sup>H NMR (500 MHz, DMSO-*d*<sub>6</sub>) (ppm)  $\delta$ : 12.34 (s, 1H, outer-NH), 8.19 (s, 1H,  $\beta$ -H), 8.16-8.15 (d, 2H,  $\beta$ -H), 7.88-7.84 (m, 5H,  $\beta$ -H), 7.79-5.69 (m, 26 H, Ph-H/Phen-H). MS (MALDI-TOF) (m/z): calctd. 898.233 [M+H]<sup>+</sup>, found 898.332. Elemental analysis calctd. (%) for C<sub>57</sub>H<sub>34</sub>NiN<sub>8</sub>; C, 76.21; H, 4.07; N, 12.93; found C, 75.33; H, 3.94; N, 12.91

#### **ZnTPP(Phen)**

Light green solid, yield: 36 mg (72%); UV  $\lambda_{\text{max}}$  ( $\epsilon \times 10^{-5} \text{ L mol}^{-1} \text{ cm}^{-1}$ ): 427 (5.24), 523 (3.60), 556 (4.06) nm; <sup>1</sup>H NMR (500 MHz, DMSO-*d*<sub>6</sub>) (ppm)  $\delta$ : 12.64 (s, 1H, outer-NH), 7.99-7.92 (br, 2H,  $\beta$ -H), 7.70-7.47 (m, 5H,  $\beta$ -H), 7.06-6.99 (m, 9H,  $\beta$ -H), 6.82-6.81 (d, 2 H, Phen-H), 6.63-6.58 (m, 10H,  $\beta$ -H/Phen-H), 5.74-5.70 (br, 2H-Phen-H) . MS (MALDI-TOF) (m/z): calctd. 898.233 [M]<sup>+</sup>, found 898.332. Elemental analysis calctd. (%) for C<sub>57</sub>H<sub>34</sub>ZnN<sub>8</sub>; C, 76.21; H, 3.92; N, 12.58; found C, 76.18; H, 4.01; N, 12.51

**CuTPP(Phen)** Red solid, yield: 43 mg (87%); UV  $\lambda_{\text{max}}$  ( $\epsilon \times 10^{-5} \text{ L mol}^{-1} \text{ cm}^{-1}$ ): 424 (5.40), 536 (4.25), 571 (3.85) nm. MS (MALDI-TOF) (m/z): calctd. 898.233 [M]<sup>+</sup>, found 898.332.

Elemental analysis calcd. (%) for  $C_{57}H_{34}CuN_8$ ; C, 76.39; H, 3.92; N, 12.56; found C, 76.25; H, 3.83; N, 12.49

$^1H$  NMR (500 MHz,  $DMSO-d_6$ ): No well-resolved signals observed due to strong paramagnetic broadening of Cu(II).

### CoTPP(Phen)

Red solid, yield: 42 mg (82%); UV  $\lambda_{max}$  ( $\epsilon \times 10^{-5} \text{ L mol}^{-1} \text{ cm}^{-1}$ ): 419 (5.28), 530 (4.29), 573 (4.07) nm. MS (MALDI-TOF) (m/z): calcd. 898.233  $[M]^+$ , found 898.332. Elemental analysis calcd. (%) for  $C_{57}H_{34}CoN_8$ ; C, 76.91; H, 3.82; N, 12.58; found C, 76.78; H, 3.87; N, 12.53

$^1H$  NMR (500 MHz,  $DMSO-d_6$ ): Paramagnetic Co(II) complex; spectra show extensive broadening, preventing meaningful peak assignment.

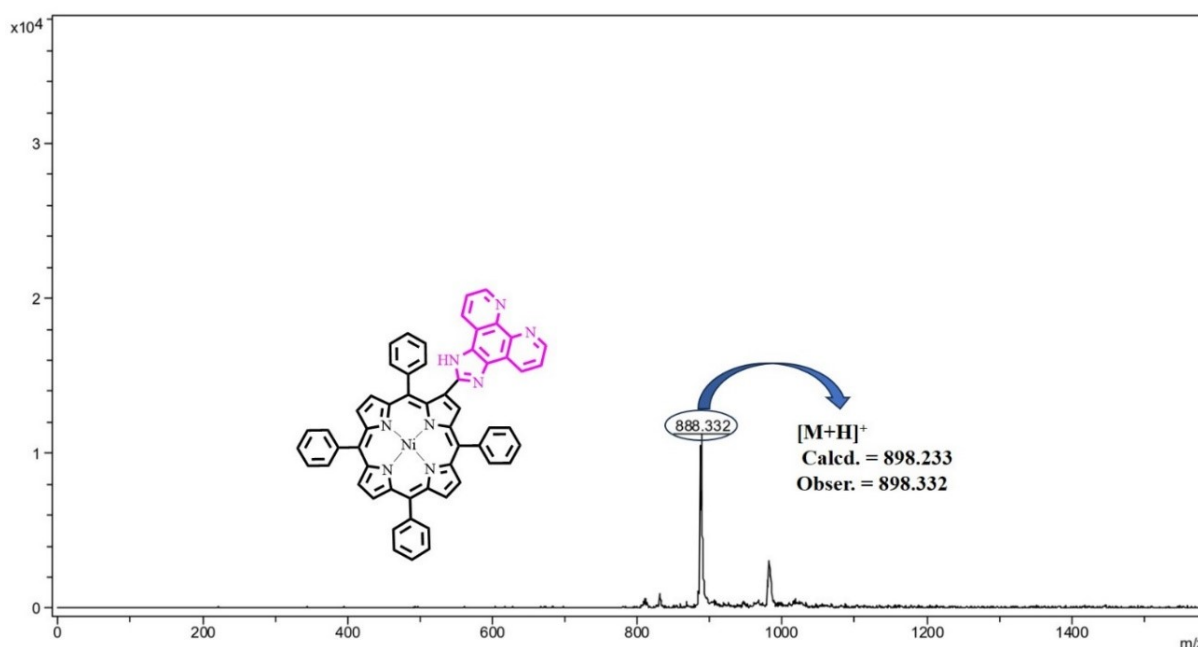

Fig. S1. MALDI-TOF mass spectrum of NiTPP(Phen) with HABA matrix in positive ion mode at 298 K.

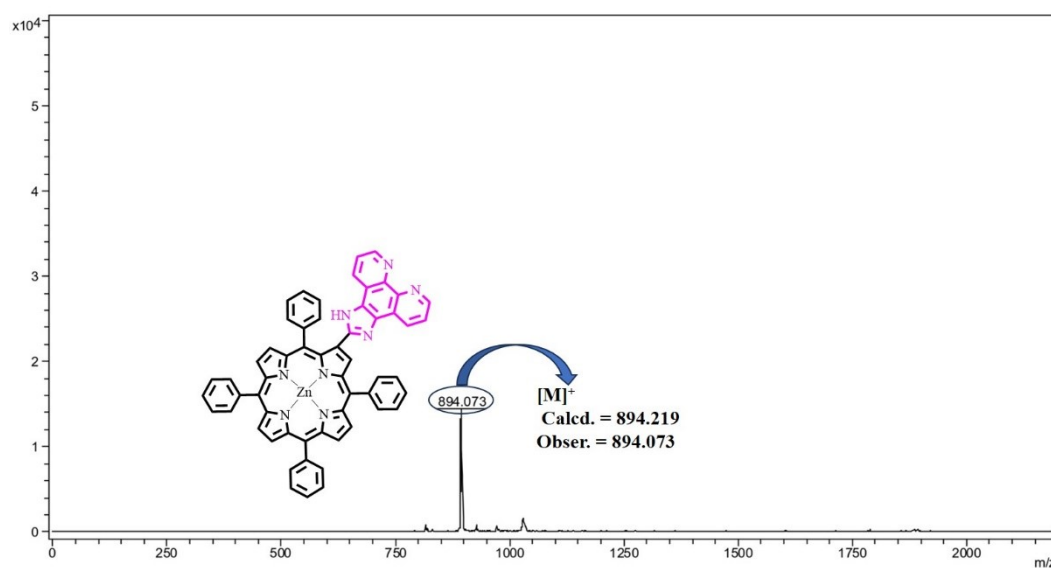

Fig. S2. MALDI-TOF mass spectrum of ZnTPP(Phen) with HABA matrix in positive ion mode at 298 K.

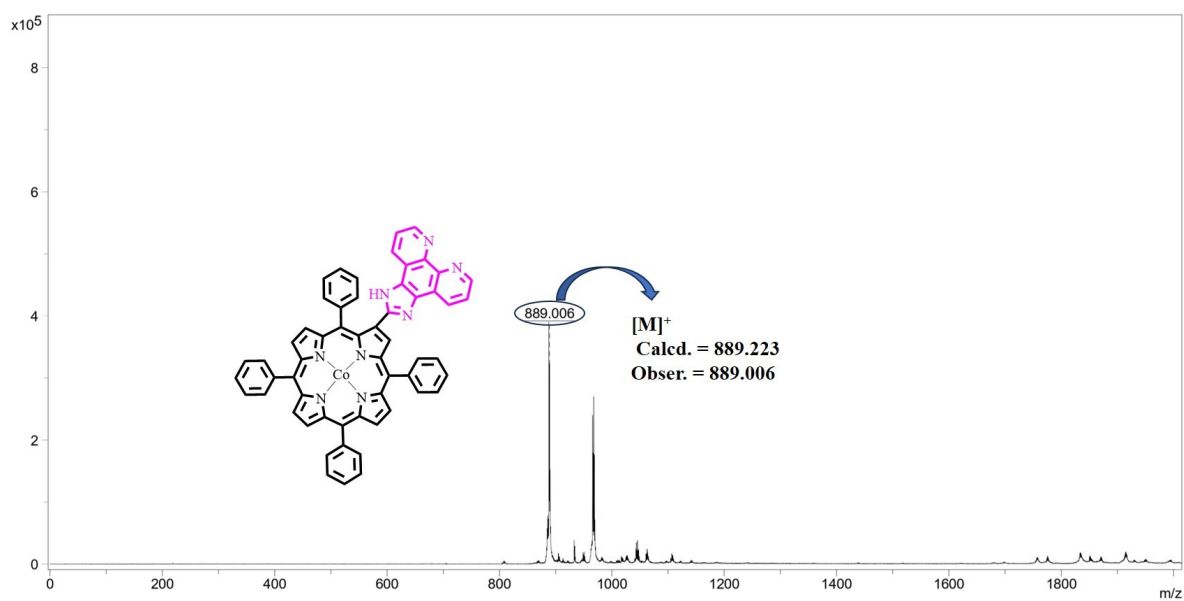

Fig. S3. MALDI-TOF mass spectrum of CoTPP(Phen) with HABA matrix in positive ion mode at 298 K.

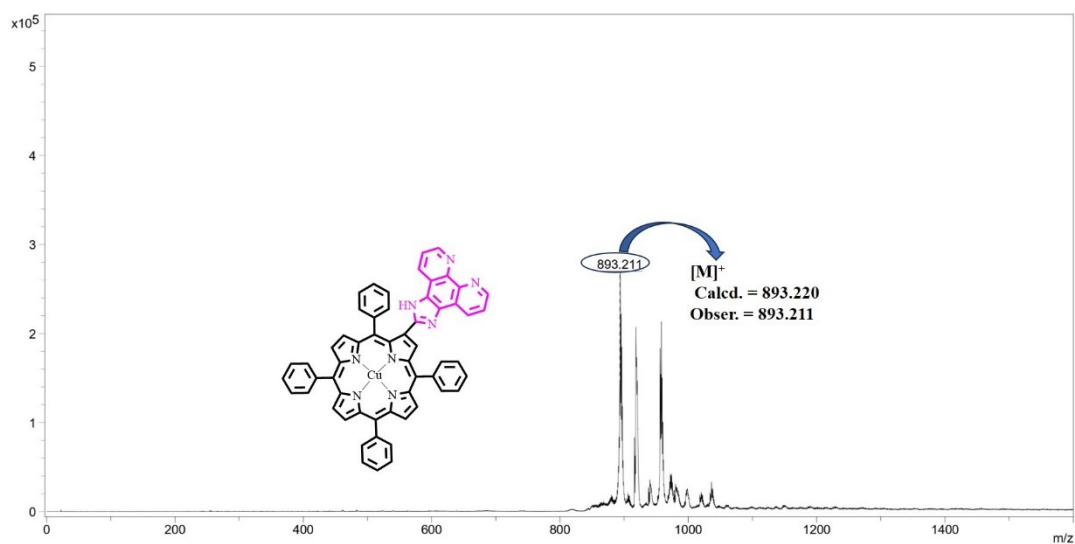

Fig. S4. MALDI-TOF mass spectrum of CuTPP(Phen) with HABA matrix in positive ion mode at 298 K.

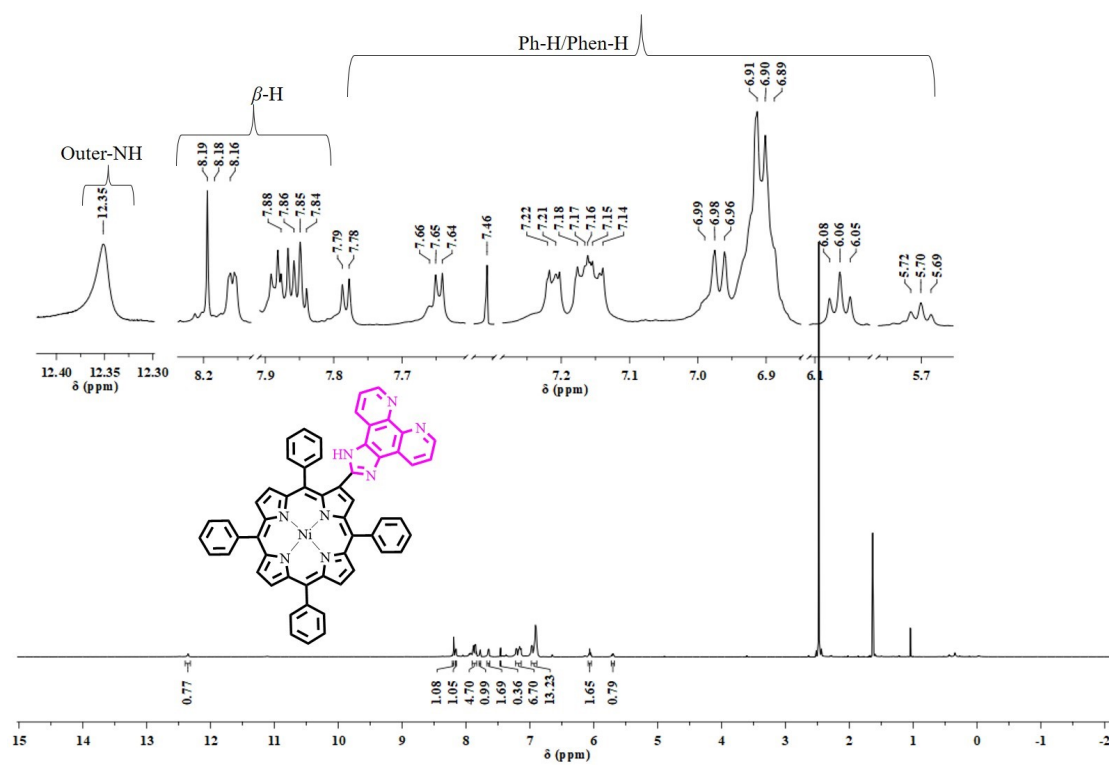

Fig. S5.  $^1\text{H}$  NMR spectrum of NiTPP(Phen) in  $\text{DMSO-d}_6$  at 298 K.

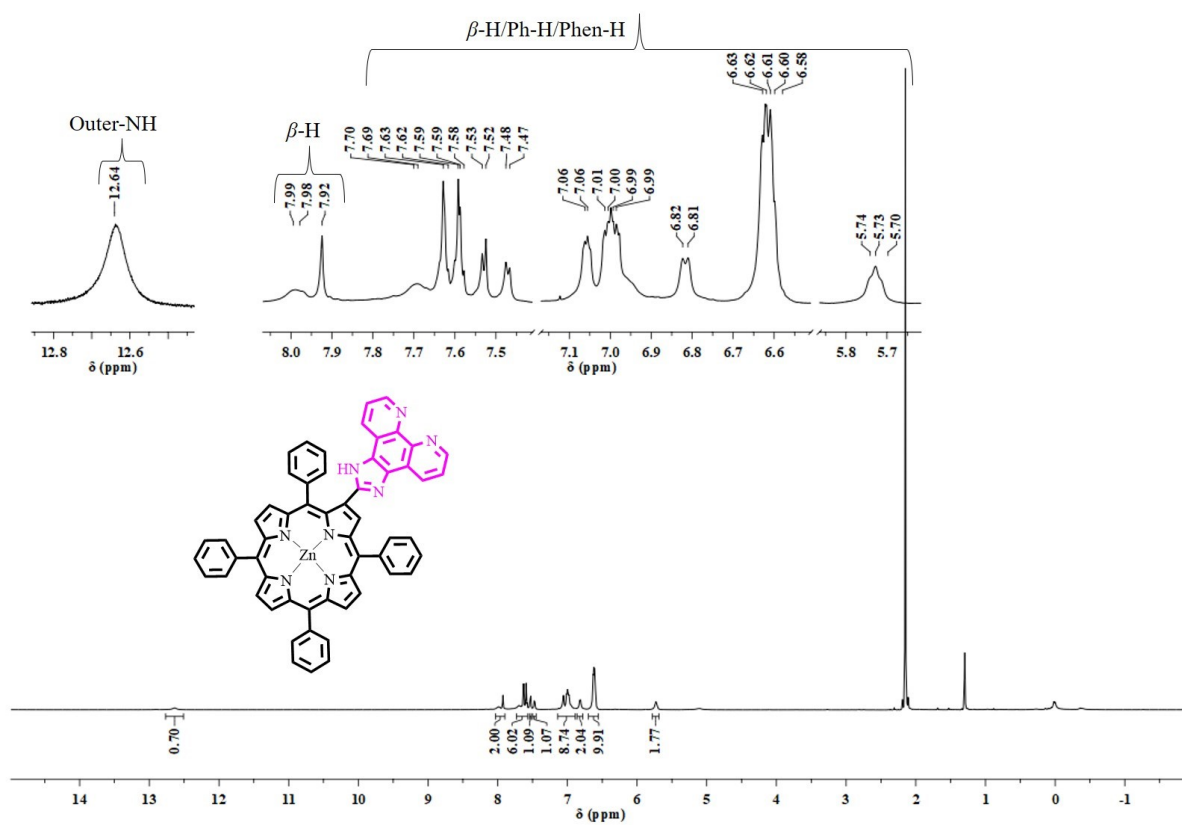

Fig. S6.  $^1\text{H}$  NMR spectrum of ZnTPP(Phen) in DMSO- $\text{d}_6$  at 298 K.

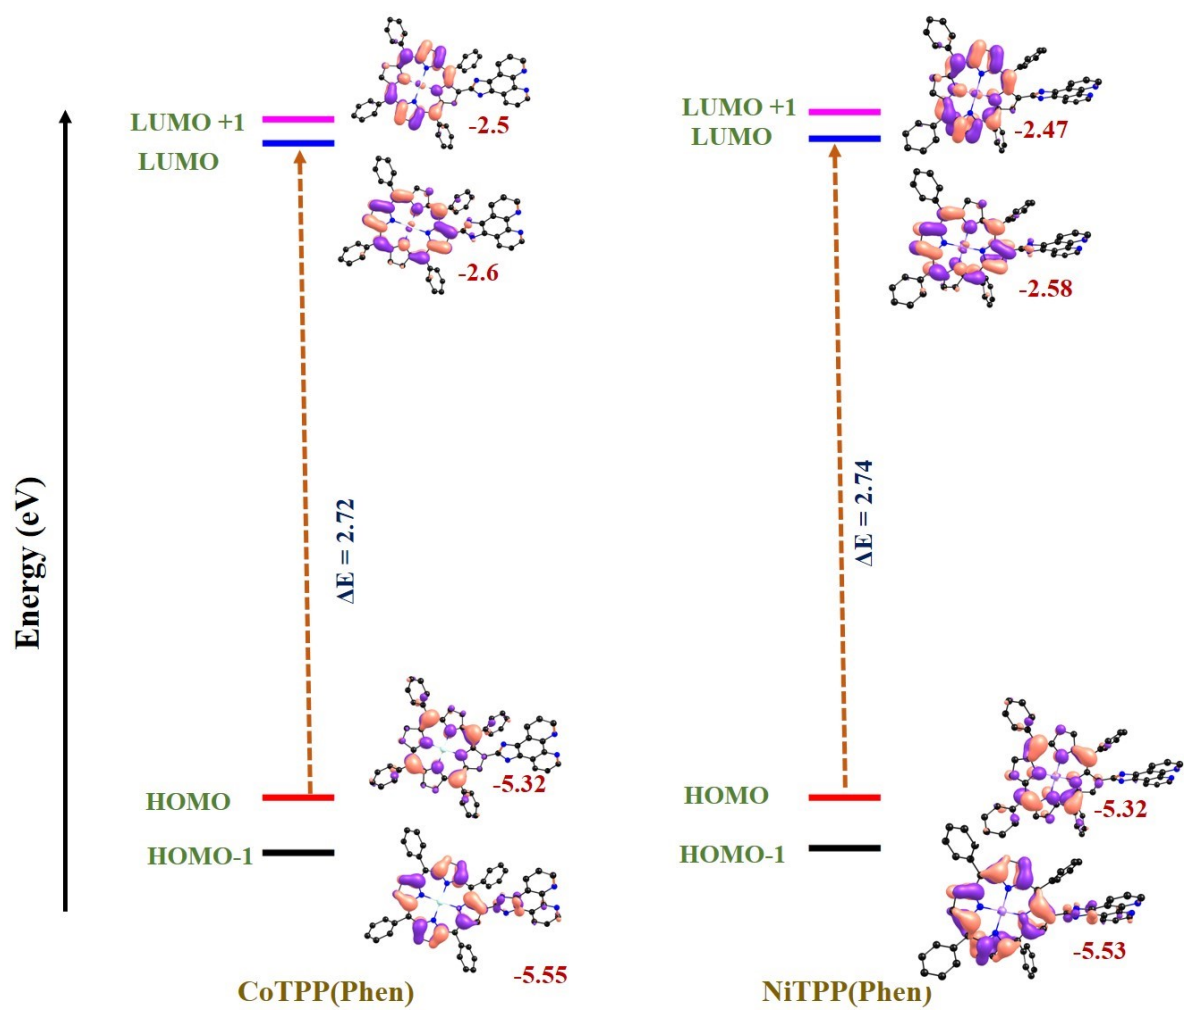

Fig. S7. Energy profile depicting frontier molecular orbitals for MTPP(Phen) (M = Co, Ni).



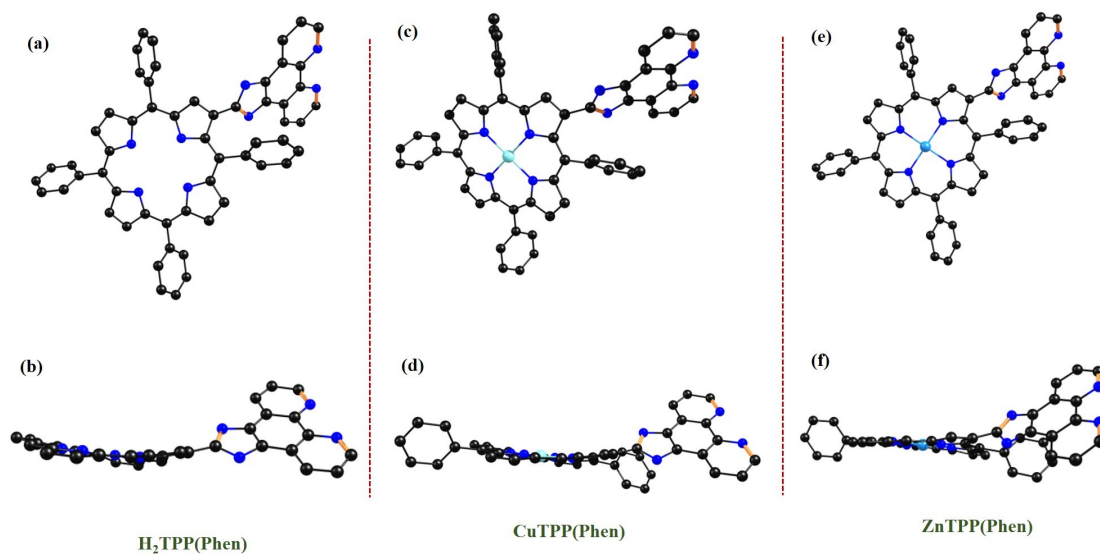

Fig. S8. Ground state optimized geometries showing top views of (a)  $H_2TPP(Phen)$ , (c)  $CuTPP(Phen)$ , (e)  $ZnTPP(Phen)$  side view (b) of  $H_2TPP(Phen)$ , (d)  $CuTPP(Phen)$ , (f)  $ZnTPP(Phen)$  (*meso*-phenyl has been removed for clarity in the side view).

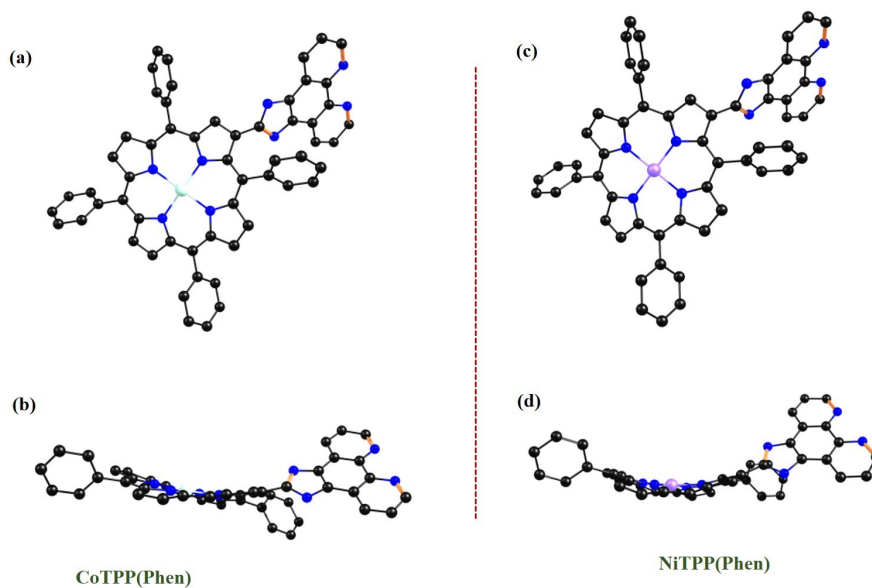

Fig. S9. Ground state optimized geometries showing top views of (a)  $CoTPP(Phen)$ , (c)  $NiTPP(Phen)$ , side view (b) of  $CoTPP(Phen)$ , (d)  $NiTPP(Phen)$  (*meso*-phenyl has been removed for clarity in the side view).



Table S1. Selected bond lengths (Å) and bond angles (°) of H<sub>2</sub>TPP(Phen), H<sub>2</sub>OPP(Phen), VOTPP(Phen), and VOOPP(Phen).

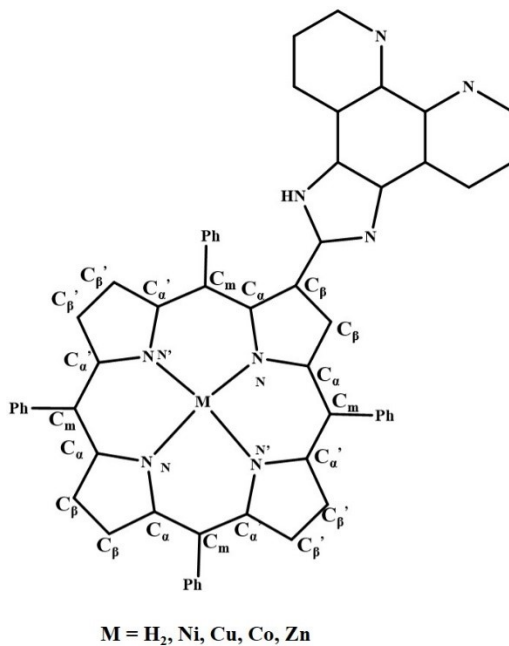

|                                   | H <sub>2</sub> TPP(Phen) | CuTPP(Phen) | NiTPP(Phen) | ZnTPP(Phen) | CoTPP(Phen) |
|-----------------------------------|--------------------------|-------------|-------------|-------------|-------------|
| Bond Length (Å)                   |                          |             |             |             |             |
| M-N                               |                          | 2.036       | 1.960       | 2.077       | 1.991       |
| M-N'                              |                          | 2.024       | 1.953       | 2.065       | 1.985       |
| C <sub>β</sub> -C <sub>β</sub>    | 1.365                    | 1.375       | 1.377       | 1.378       | 1.375       |
| C <sub>β</sub> '-C <sub>β</sub> ' | 1.373                    | 1.371       | 1.370       | 1.373       | 1.370       |
| N-C <sub>α</sub>                  | 1.382                    | 1.397       | 1.399       | 1.395       | 1.400       |
| N-C <sub>α</sub> '                | 1.386                    | 1.397       | 1.398       | 1.396       | 1.400       |
| C <sub>α</sub> -C <sub>β</sub>    | 1.464                    | 1.454       | 1.451       | 1.457       | 1.451       |
| C <sub>α</sub> '-C <sub>β</sub> ' | 1.439                    | 1.454       | 1.452       | 1.457       | 1.452       |
| C <sub>α</sub> -C <sub>m</sub>    | 1.412                    | 1.409       | 1.403       | 1.417       | 1.404       |
| C <sub>α</sub> '-C <sub>m</sub> ' | 1.406                    | 1.407       | 1.402       | 1.416       | 1.403       |
| ΔC <sub>β</sub>                   | 0.363                    | 0.344       | 0.445       | 0.261       | 0.512       |

|                                                                                                       |        |         |         |         |         |
|-------------------------------------------------------------------------------------------------------|--------|---------|---------|---------|---------|
| $\Delta 24$                                                                                           | 0.171  | 0.163   | 0.313   | 0.120   | 0.257   |
| Bond Angle (°)                                                                                        |        |         |         |         |         |
| M-N-C <sub><math>\alpha</math></sub>                                                                  |        | 126.505 | 126.92  | 126.12  | 126.967 |
| M-N'-C <sub><math>\alpha'</math></sub>                                                                |        | 126.56  | 126.985 | 126.227 | 126.987 |
| N-M-N                                                                                                 |        | 178.32  | 176.49  | 179.56  | 175.64  |
| N'-M-N'                                                                                               |        | 180.00  | 176.57  | 179.71  | 175.83  |
| N-C <sub><math>\alpha</math></sub> -C <sub><math>m</math></sub>                                       | 125.73 | 126     | 125.464 | 125.825 | 125.635 |
| N'-C <sub><math>\alpha'</math></sub> -C <sub><math>m</math></sub>                                     | 126.85 | 126.415 | 125.857 | 126.262 | 125.987 |
| N-C <sub><math>\alpha</math></sub> -C <sub><math>\beta</math></sub>                                   | 110.09 | 109.465 | 109.912 | 108.937 | 109.962 |
| N'-C <sub><math>\alpha'</math></sub> -C <sub><math>\beta'</math></sub>                                | 106.30 | 109.602 | 110.047 | 109.07  | 110.092 |
| C <sub><math>\beta</math></sub> -C <sub><math>\alpha</math></sub> -C <sub><math>m</math></sub>        | 124.13 | 124.487 | 124.247 | 125.21  | 124.285 |
| C <sub><math>\beta'</math></sub> -C <sub><math>\alpha'</math></sub> -C <sub><math>m</math></sub>      | 126.83 | 123.972 | 123.89  | 124.67  | 123.855 |
| C <sub><math>\alpha</math></sub> -C <sub><math>m</math></sub> -C <sub><math>\alpha'</math></sub>      | 124.87 | 123.075 | 120.937 | 124.672 | 121.872 |
| C <sub><math>\alpha</math></sub> -C <sub><math>\beta</math></sub> -C <sub><math>\beta</math></sub>    | 106.75 | 107.23  | 107.08  | 107.352 | 107.125 |
| C <sub><math>\alpha'</math></sub> -C <sub><math>\beta'</math></sub> -C <sub><math>\beta'</math></sub> | 108.35 | 107.265 | 107.122 | 107.385 | 107.152 |
| C <sub><math>\alpha</math></sub> -N-C <sub><math>\alpha</math></sub>                                  | 106.20 | 106.495 | 105.50  | 107.34  | 105.52  |
| C <sub><math>\alpha'</math></sub> -N-C <sub><math>\alpha'</math></sub>                                | 110.65 | 106.22  | 105.685 | 107.06  | 105.35  |
